# Supplementary material for: ZIF-67-derived Se-doped CoSe2 grown on carbon nanofibers as oxygen electrocatalysts for rechargeable Zn–air batteries
Source: Royal Society of Chemistry journal article supplement (doi:10.1039/d3nj05569h), 2024-01-01
Supplement: d3nj05569h1.pdf [file d3nj05569h1.pdf]

## Supplementary Material

### **ZIF-67-derived Se-doped CoSe<sub>2</sub> grown on carbon nanofibers as oxygen electrocatalysis for rechargeable Zn-air batteries**

Wenjing Cui<sup>a,b</sup>, Shaoshuai Xu<sup>a,b</sup>, Jie Bai<sup>a,b</sup>, Chunping Li<sup>a,b</sup> and Xingwei Sun<sup>\*a,b</sup>

<sup>a</sup>Chemical Engineering College, Inner Mongolia University of Technology,  
Hohhot, 010051, People's Republic of China

<sup>b</sup>Inner Mongolia Key Laboratory of Industrial Catalysis, Hohhot, 010051,  
People's Republic of China

\*Corresponding authors: Xingwei Sun

Tel: +86471 6575722.

Fax: +86471 6575722.

E-mail address: sxw@imut.edu.cn

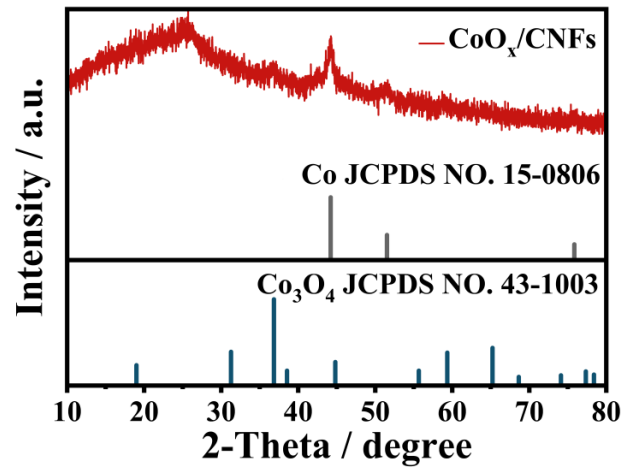

Fig. S1 XRD profiles of  $\text{CoO}_x/\text{CNFs}$

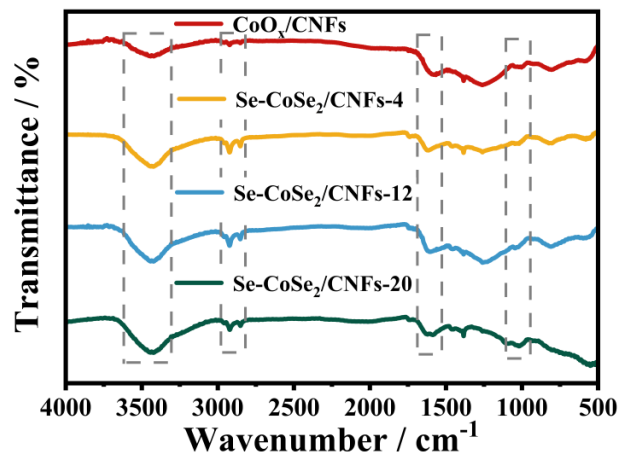

Fig. S2 FTIR spectra of  $\text{CoO}_x/\text{CNFs}$ ,  $\text{Se-CoSe}_2/\text{CNFs-4}$ ,  $\text{Se-CoSe}_2/\text{CNFs-12}$ ,  $\text{Se-CoSe}_2/\text{CNFs-20}$

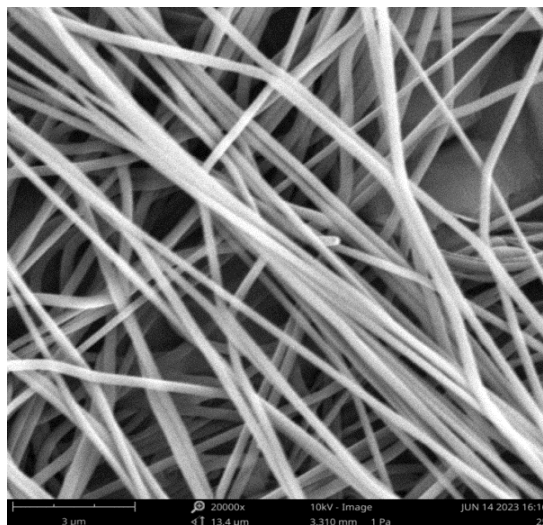

Fig. S3 SEM images of pure 2-MI/PAN

**Table S1** ICP-OES of various Se-CoSe<sub>2</sub>/CNFs

| Sample name                   | Co loading/wt. % | Se loading/wt. % | Co/Se molar ratio |
|-------------------------------|------------------|------------------|-------------------|
| Se-CoSe <sub>2</sub> /CNFs-4  | 6.65             | 17.16            | 1.1/2.2           |
| Se-CoSe <sub>2</sub> /CNFs-12 | 7.71             | 20.98            | 1.3/2.7           |
| Se-CoSe <sub>2</sub> /CNFs-20 | 9.25             | 27.92            | 1.6/3.5           |

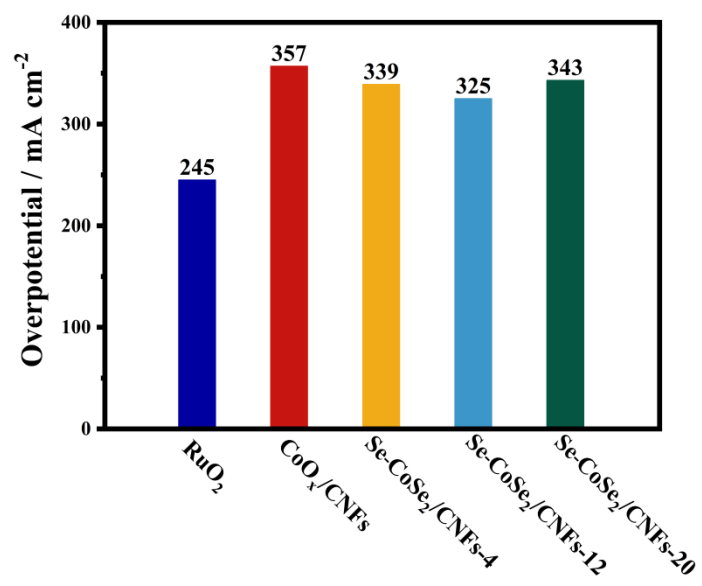

**Fig. S4** Overpotentials at 10 mA cm<sup>-2</sup> for four catalysts

**Table S2** Comparison of the OER performance of different catalysts

| catalyst                                    | $E_{\text{OER}}@10 \text{ mA cm}^{-2}$<br>(V vs. RHE) | Reference                                                                     |
|---------------------------------------------|-------------------------------------------------------|-------------------------------------------------------------------------------|
| Se-CoSe <sub>2</sub> /CNFs-12               | 1.55                                                  | This work                                                                     |
| CoSe/MoSe <sub>2</sub>                      | 1.63                                                  | <b>ACS Sustainable<br/>Chemistry &amp; Engineering</b><br>2022, 10, 9980-9990 |
| Se/Fe-Co <sub>3</sub> O <sub>4</sub> /N-CNs | 1.59                                                  | <b>Journal of Colloid and<br/>Interface Science</b><br>2022, 626, 475-485     |
| CoSe <sub>2</sub> @NC                       | 1.57                                                  | <b>Nano Energy</b><br>2022, 91, 106675                                        |
| CoSe <sub>2</sub> /CoNC                     | 1.61                                                  | <b>Journal of Colloid and<br/>Interface Science</b><br>2023, 643, 73.81       |
| Co/CoSe@NC                                  | 1.58                                                  | <b>Chemical Engineering<br/>Journal</b><br>2022, 450, 137991                  |
| CoSe <sub>2</sub> @CoNi LDH HNA             | 1.58                                                  | <b>Advanced Science</b><br>2022, 9, 2104522                                   |

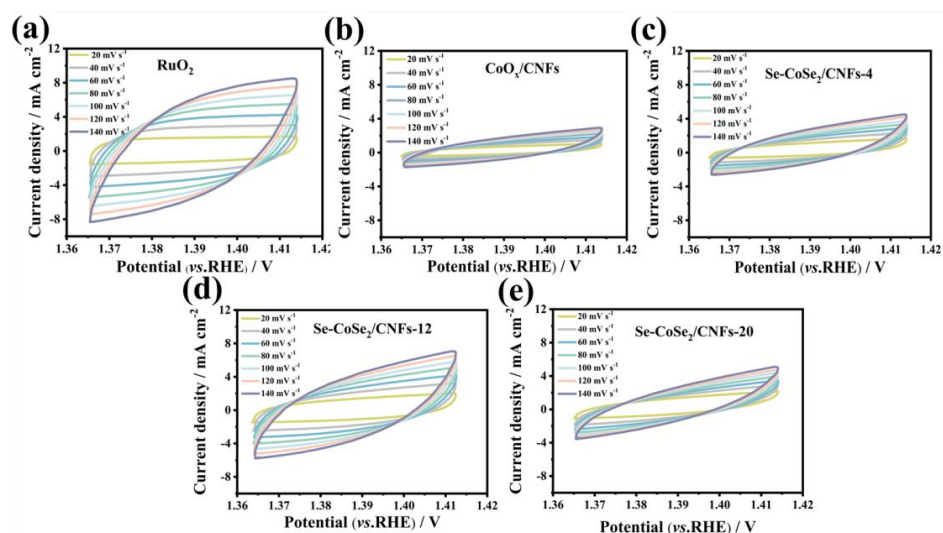

**Fig. S5** The CV measurements in a non-faradic current region of (a) RuO<sub>2</sub>, (b) CoO<sub>x</sub>/CNFs, (c) Se-CoSe<sub>2</sub>/CNFs-4, (d) Se-CoSe<sub>2</sub>/CNFs-12, (e) Se-CoSe<sub>2</sub>/CNFs-20 samples at different scan rates of 20, 40, 60, 80, 100, and 120 mV s<sup>-1</sup>

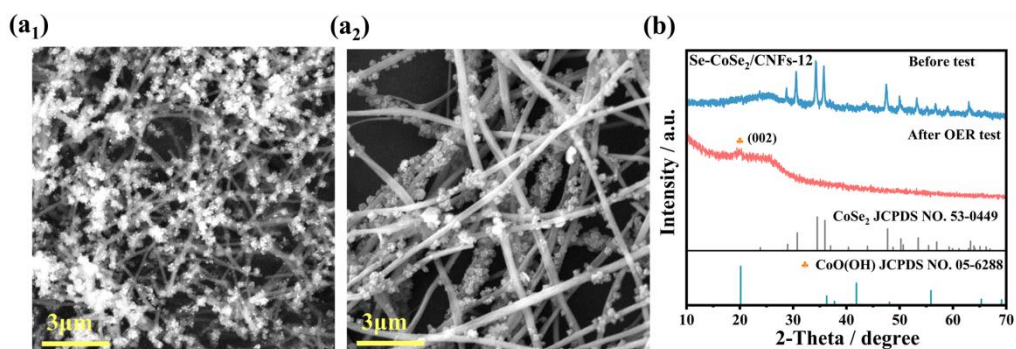

**Fig. S6** SEM of (a<sub>1</sub>) the fresh Se-CoSe<sub>2</sub>/CNFs-12 and (a<sub>2</sub>) the catalyst after the electrochemical test Se-CoSe<sub>2</sub>/CNFs-12, (b) XRD of fresh Se-CoSe<sub>2</sub>/CNFs-12 and Se-CoSe<sub>2</sub>/CNFs-12 after electrochemical cycling in 1 M KOH solution

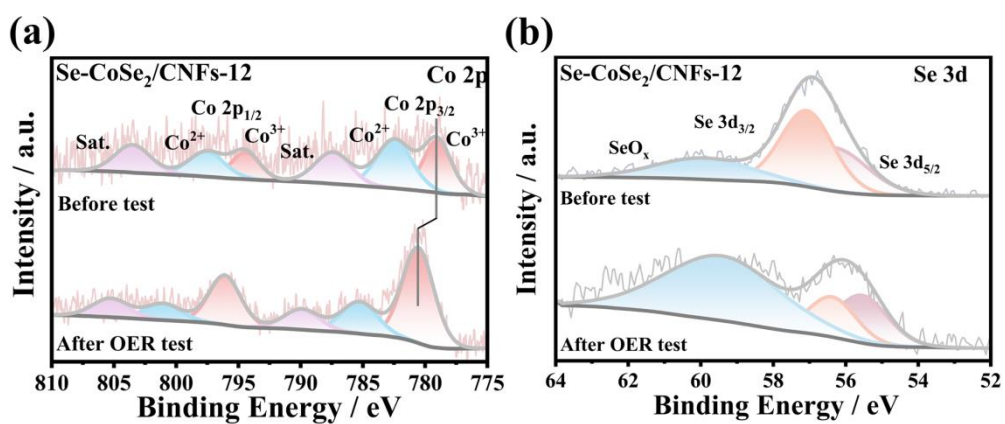

**Fig. S7** XPS spectra of the fresh Se-CoSe<sub>2</sub>/CNFs-12 and the catalyst after the electrochemical test Se-CoSe<sub>2</sub>/CNFs-12 (a) Co 2p, (b) Se 3d

**Table S3** Comparison of the ORR performance of different catalysts

| catalyst                                             | Half wave potential (V vs. RHE) | Reference                                                             |
|------------------------------------------------------|---------------------------------|-----------------------------------------------------------------------|
| Se-CoSe <sub>2</sub> /CNFs-12                        | 0.80                            | This work                                                             |
| Se/Fe-Co <sub>3</sub> O <sub>4</sub> /N-CNs          | 0.80                            | <b>Journal of Colloid and Interface Science</b><br>2022, 626, 475-485 |
| (Ni,Co)Se <sub>2</sub>                               | 0.70                            | <b>Journal of Energy Chemistry</b><br>2019, 38, 34-40                 |
| Fe-doped MOF CuCoSe nanostructure                    | 0.76                            | <b>Applied Catalysis B: Environmental</b><br>2021, 293, 120209        |
| Cu <sub>14</sub> Co <sub>3</sub> Se <sub>4</sub> /GC | 0.78                            | <b>ACS Catalysis</b><br>2019, 9, 10761-10772                          |
| C@Co(OH)Se                                           | 0.79                            | <b>Chemical Engineering Journal</b><br>2023, 467, 143359              |
| CeO <sub>2</sub> @CoSe <sub>2</sub> -NCs             | 0.76                            | <b>Journal of Colloid and Interface Science</b><br>2022, 625, 839-849 |

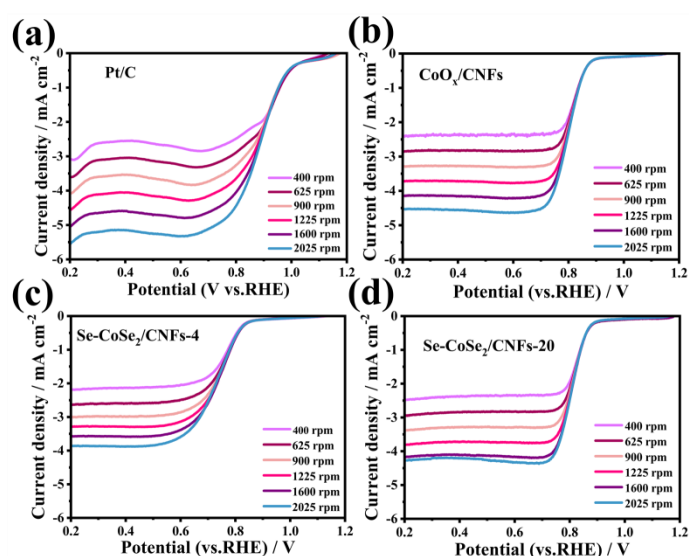

**Fig. S8** LSV curves of (a) Pt/C, (b) CoO<sub>x</sub>/CNFs, (c) Se-CoSe<sub>2</sub>/CNFs-4, (d) Se-CoSe<sub>2</sub>/CNFs-20 in O<sub>2</sub>-saturated 0.1 M KOH at various rotation speeds, respectively

**Table S4** A survey of the performance of Zn-air batteries with various electrocatalysts

| <b>catalyst</b>                                       | <b>Power Density<br/>(mW cm<sup>-2</sup>)</b> | <b>Reference</b>                                                          |
|-------------------------------------------------------|-----------------------------------------------|---------------------------------------------------------------------------|
| Se-CoSe <sub>2</sub> /CNFs-12                         | 149.4                                         | This work                                                                 |
| Co/CoSe@NC                                            | 145                                           | <b>Chemical Engineering<br/>Journal</b><br>2022, 450, 137991              |
| P-CoSe <sub>2</sub> /C@CC                             | 124.4                                         | <b>Journal of Colloid and<br/>Interface Science</b><br>2023, 633, 424-431 |
| CoSe <sub>2</sub> @NC                                 | 137.1                                         | <b>Nano Energy</b><br>2022, 91, 106675                                    |
| CoSe <sub>2</sub> /Co@NCNF-3                          | 79.0                                          | <b>Journal of Alloys and<br/>Compounds</b><br>2021, 875, 160056           |
| O-Co <sub>0.5</sub> Mo <sub>0.5</sub> Se <sub>2</sub> | 120.28                                        | <b>Small</b><br>2020, 16, 2000797                                         |
| C@Co(OH)Se                                            | 54.8                                          | <b>Chemical Engineering<br/>Journal</b><br>2023, 467, 143359              |
